## 1 **Engineering BCMA CAR T cells for myeloma-targeted cargo delivery**

2 Thomas Kimman<sup>1</sup>, Marta Cuenca<sup>1</sup>, Anne Slomp<sup>1</sup>, Ralph G Tieland<sup>1</sup>, Dedek Rockx-Brouwer<sup>1</sup>, Sabine  
3 Heijhuurs<sup>1</sup>, Angelo D. Meringa<sup>1</sup>, Wendy Boschloo<sup>1</sup>, Douwe MT Bosma<sup>1</sup>, Sanne Kroos<sup>1</sup>, Vania lo Presti<sup>1,2</sup>,  
4 Stefan Nierkens<sup>1,2,3</sup>, Niels Bovenschen<sup>1,4,5</sup>, Jürgen Kuball<sup>1,4,6</sup>, Monique C Minnema<sup>4,6</sup>, Zsolt Sebestyén<sup>1,4</sup>,  
5 Victor Peperzak<sup>1,4,#</sup>

6 1. Center for Translational Immunology, University Medical Center Utrecht, Utrecht,  
7 Netherlands.

8 2. Blood and Marrow Transplantation Program, Princess Máxima Center for Pediatric Oncology,  
9 Utrecht, The Netherlands.

10 3. Princess Máxima Center for Pediatric Oncology, Utrecht, The Netherlands

11 4. Utrecht University, Utrecht, Netherlands.

12 5. Department of Pathology, University Medical Centre Utrecht, Utrecht, Netherlands.

13 6. Department of Hematology, University Medical Centre Utrecht, Utrecht, Netherlands.

14 # Corresponding author

15

### 16 **Abstract**

17 Clinical responses with chimeric antigen receptor (CAR) T cells are encouraging, however, primary  
18 resistance and relapse after therapy prevent durable remission in a large fraction of cancer patients.

19 One of the underlying causes comprises apoptosis resistance mechanisms in cancer cells that limit  
20 killing by CAR T cells. Therefore, we developed a technology that boosts tumor cell apoptosis induced

21 by CAR T cells. We reveal that B cell maturation antigen (BCMA) CAR T cells equipped with a granzyme

22 B-NOXA fusion construct improves killing of multiple myeloma (MM) cells, both in vitro and in a

23 xenograft mouse model, by localizing NOXA to cytotoxic granules that are released into cancer cells

24 upon contact. Since MM cells critically depend on MCL-1 expression, inhibition by its natural ligand

25 NOXA effectively induces apoptosis. Overall, this strategy allows specific delivery of cargo into cancer

26 cells and improves killing efficacy of CAR T cells in a tailor-made manner.

27

28

29

30

31

32

33

## 34 **Introduction**

35 Recent clinical success of immunotherapy has made a colossal impact on the development of novel  
36 therapeutic approaches targeting cancer. Engineered T cell therapy is, together with the discovery of  
37 checkpoint inhibitors, one of the most promising types of anti-cancer immunotherapy where scientific  
38 efforts are accompanied with high investments by industry<sup>1</sup>. Despite their initial successes, clinical trials  
39 with engineered T cells, and specifically with chimeric antigen receptor (CAR) T cells, revealed two  
40 major weaknesses: (1) primary resistance upon treatment with CD19-specific CAR T cells in chronic  
41 lymphocytic leukemia (CLL) and diffuse large B cell lymphoma (DLBCL), and (2) disease relapse after  
42 treatment with CD19-specific CAR T cells for B cell acute lymphoblastic leukemia (B-ALL) or with B cell  
43 maturation antigen (BCMA)-specific CAR T cells for multiple myeloma (MM)<sup>2,3</sup>. Resolving these  
44 weaknesses could greatly increase effectivity and broad applicability of engineered T cell therapy  
45 against cancer. Previously described limitations to successful CAR T cell therapy include antigen loss on  
46 cancer cells and failed CAR T cell expansion and persistence<sup>4</sup>. While multiple strategies have been  
47 considered to improve gene engineered T cells, attempts to directly improve their killing capacity  
48 remain neglected<sup>5</sup>. If initial CAR T cell-directed killing of cancer cells can be improved, subsequent  
49 selection for antigen-negative cancer cells and CAR T cell persistence become less relevant. There is  
50 ample evidence that CAR T cell-induced apoptosis is often suboptimal and that apoptosis resistance  
51 mechanisms limit effective responses to CAR T cell therapy in various B cell malignancies. For example,  
52 increased expression of pro-survival protein BCL-2 has been observed in B lymphoma cells that survive  
53 treatment with CD19 CAR T cells and therefore entails a resistance mechanism that disables the natural  
54 killing machinery of CAR T cells<sup>6</sup>. In line with these findings it was shown using genome-wide  
55 CRISPR/Cas9 screening that loss of pro-apoptotic BCL-2 family protein NOXA in B lymphoma cells  
56 regulates resistance to CAR T cell therapy by impairing apoptosis of tumor cells<sup>7</sup>. Execution of target  
57 cell apoptosis can be mediated by release of granzymes by CAR T cells or by engaging death receptors  
58 on targeted cancer cells. Interestingly, resistance mechanisms for both pathways have been described.  
59 Two separate studies used genome wide CRISPR/Cas9 knock-out screens in B-ALL cells to reveal that

60 death receptor TRAIL-R2 (TNFRSF10B), and downstream signaling molecules FADD, BID and CASP8,  
61 mediate sensitivity to CD19 CAR T cell killing<sup>8,9</sup>. In addition, we have recently shown that expression of  
62 granzyme B-inhibitor serpin B9 in DLBCL and CLL cells inhibits killing by CD19 or CD20 CAR T cells,  
63 thereby revealing another apoptosis resistance mechanism<sup>10</sup>. Rather than bypassing specific apoptosis  
64 resistance mechanisms, such as those described above, we explored the possibility to directly enhance  
65 the killing potential of CAR T cells to dampen primary resistance and reduce the chance of disease  
66 relapse.

67

## 68 **Results**

69 BCL-2 family member MCL-1 is a key pro-survival factor for MM cells and its elevated expression is  
70 associated with chemoresistance and shorter event-free survival in MM<sup>11,12,13</sup>. Therefore, we examined  
71 if MCL-1 expression was also enriched in MM cells that resist killing by BCMA CAR T cells (**Fig. 1a**).  
72 Human MM cell lines NCI-H929 and L363 were co-cultured with BCMA CAR T cells and intracellular  
73 MCL-1 protein expression was subsequently measured in viable MM cells. We found that MCL-1  
74 expression was increased in surviving MM cells after co-culture with BCMA CAR T cells compared to  
75 expression in MM cells cultured alone (**Fig. 1b,c**). Since MCL-1 can be targeted with specific small  
76 molecule inhibitors we added MCL-1-inhibitor S63845 during co-culture of MM cells with BCMA CAR T  
77 cells<sup>14,15</sup>. This resulted in improved killing of MM cells compared to co-culture with BCMA CAR T cells  
78 alone (**Fig. 1d,e**), including for L363 MM cells that are relatively resistant to BCMA CAR T cells. These  
79 experiments combined illustrate that BCMA CAR T cell-mediated MM cell killing can be enhanced by  
80 simultaneous targeting of MCL-1 and suggest that co-treatment may be clinically advantageous.  
81 However, we and others have shown that MCL-1 expression sustains survival of many healthy cells and  
82 tissues and co-treatment with a systemic MCL-1 inhibitor would generate undesired side-effects,  
83 precluding its use as a safe anti-cancer drug<sup>16,17,18,19,20</sup>. For example, it was shown that genetic deletion  
84 of *Mcl1* in mice causes lethal cardiac failure and that MCL-1 inhibition promotes apoptosis of human  
85 iPSC-derived cardiomyocytes<sup>21,22</sup>. Regardless of these findings, multiple pharmaceutical companies

86 generated MCL-1-specific inhibitors for treatment of MM, acute myeloid leukemia (AML) and B cell  
87 lymphoma that were tested in phase I clinical trials. Currently, most of these clinical trials have been  
88 put on FDA-instructed or voluntary hold due to dose-related cardiac toxicity<sup>23</sup>. Thus, although MCL-1 is  
89 a bona fide MM target, it should be inhibited in MM cells specifically to allow safe and effective  
90 treatment. To target MCL-1 specifically in cancer cells and avoid systemic toxicity we explored the  
91 possibility of MCL-1-inhibitor delivery via CAR T cells.

92 BH3-only protein NOXA is a p53-inducible selective inhibitor of MCL-1 and associated with apoptosis  
93 induction in many forms of cancer, including MM<sup>24,25</sup>. Interestingly, it was reported that low NOXA  
94 expression in relapsed/refractory B-cell lymphoma cells correlated with worse patient survival after  
95 tandem CD19/20 CAR T cell treatment and that pharmacologically-induced expression of NOXA  
96 sensitized cancer cells to CAR T cell-mediated killing<sup>7</sup>. These findings indicate that the level of NOXA  
97 expression in cancer cells may determine their sensitivity to CAR T cell-mediated killing. To test whether  
98 exogenous delivery of NOXA induces apoptosis in cancer cells that depend on MCL-1 expression for  
99 survival, we treated MM cells with synthetic NOXA together with sub-lytic concentrations of pore-  
100 forming protein streptolysin O (SLO) to facilitate NOXA delivery in target cells. We could visualize entry  
101 of fluorescently labelled synthetic NOXA (NOXA-TAMRA) into the cytosol of L363 MM or OCI-Ly10  
102 DLBCL cells by confocal microscopy (**Extended Data Fig. 1a,b**) and revealed binding to intracellular MCL-  
103 1 by immunoprecipitation (**Fig. 1f**). The introduced NOXA promoted MM cell apoptosis in a dose-  
104 dependent manner, which shows that delivery of NOXA specifically into tumor cells is sufficient to  
105 induce tumor cell killing (**Fig. 1g and Extended Data Fig. 1c-e**).

106 Next, we developed a strategy to load proteins of choice in cytotoxic granules of CAR T cells that can  
107 be released into target cells upon contact (**Fig. 2a**). The ultimate aim with this strategy is to boost CAR-  
108 T cell cytotoxicity and kill additional cancer cells that would resist killing by standard CAR T cell  
109 mechanisms, including release of cytotoxic granules containing perforin and granzymes, and ligation of  
110 death receptors on cancer cells. To achieve this, we cloned cargo proteins, including the red fluorescent

111 protein mScarlet, behind the sequence encoding granzyme B in a lentiviral vector (**Fig. 2b**). Using  
112 confocal microscopy we confirmed that these cargo proteins localize to LAMP-1-positive cytotoxic  
113 granules in transduced primary human T cells (**Fig. 2c**). Next, we transduced BCMA CAR T cells with the  
114 construct as shown in Fig. 2b and co-cultured these with MM cells. In time, accumulation of fluorescent  
115 mScarlet could be detected in the targeted MM cells (**Fig. 2d,e**). EGFP, that was placed behind a T2A  
116 sequence and not directly located behind the granzyme B sequence, was not localized to cytotoxic  
117 granules in transduced BCMA CAR T cells and was therefore not delivered to MM cells after co-culture  
118 (**Fig. 2c,d,f**). Replacing mScarlet by the more stable fluorescent protein mNeonGreen allowed  
119 visualizing cargo transfer in timelapse confocal imaging (**Extended Data Fig. 2a**). Co-culture of BCMA  
120 CAR T cells transduced with the Granzyme B-mNeonGreen construct together with MM H929 cells  
121 showed re-localization of mNeonGreen to the synapse with MM cells, followed by delivery of a portion  
122 of the mNeonGreen cargo from the CAR T cells into the cytosol of MM cells (**Extended Data Fig. 2b**).  
123 Combined, these experiments reveal that using our strategy proteins of choice can be localized to  
124 cytotoxic granules in CAR T cells and delivered specifically into targeted cancer cells upon contact.

125 To test improved killing of MCL-1-dependent cancer cells by CAR T cells, we cloned the sequence  
126 encoding NOXA behind granzyme B, as we did for mScarlet (**Fig. 3a,b**). As control, we introduced 3 point  
127 mutations in the BCL-2 homology 3 (BH3) domain of NOXA, which is used for binding and inhibiting  
128 MCL-1 (**Fig. 3b**). These point mutations render NOXA inactive (iNOXA) and unable to bind MCL-1<sup>26</sup>. By  
129 using HA-tagged versions of NOXA and iNOXA we could visualize their intracellular localization in  
130 transduced T cells. As expected from our findings with fluorescent cargo molecules (**Fig. 2c**), we  
131 observed that NOXA and iNOXA localize to LAMP-1-positive cytotoxic granules in transduced primary T  
132 cells or in NK cell line YT-Indy (**Extended Data Fig. 3a-c**). BCMA CAR T cells transduced with constructs  
133 containing NOXA (NOXA-BCMA CAR T cells) increased apoptosis of MM cell lines H929 (**Fig. 3c**) and  
134 RPMI-8226 (**Extended Data Fig. 4a**), as well as primary MM cells (**Fig. 3d**), compared to control BCMA  
135 CAR T cells transduced with iNOXA (iNOXA-BCMA CAR T cells). Our findings were not only restricted to  
136 BCMA CAR T cells since YT-Indy NK cells transduced with constructs containing NOXA killed H929 MM

137 cells (**Extended Data Fig. 4b**) and diffuse large B cell lymphoma (DLBCL) cell line OCI-Ly7 (**Extended**  
138 **Data Fig. 4c**) better than NK cells transduced with iNOXA. To confirm improved killing by NOXA-BCMA  
139 CAR T cells in an in vivo model, we performed mouse xenograft experiments. Here, immune deficient  
140 NOD SCID gamma (NSG) mice were intravenously injected with luciferase-transduced RPMI-8226 MM  
141 cells. Three weeks after tumor engraftment, when tumor cells could be visualized, NOXA-BCMA or  
142 iNOXA-BCMA CAR T cells were intravenously injected ( $0.8 \times 10^6$  CAR T cells per mouse in a 1:1 CD4:CD8  
143 T cell ratio) and tumor growth was monitored in time using bioluminescence imaging (BLI) (**Fig. 3e**). In  
144 this in vivo model, MM outgrowth was significantly delayed in mice receiving NOXA-BCMA CAR T cells  
145 as compared to mice receiving iNOXA-BCMA CAR T cells, similar to in vitro observations (**Fig. 3f,g**).  
146 Strategies to indirectly improve CAR T cell killing efficacy have previously been demonstrated. This  
147 includes CAR T cells secreting proinflammatory cytokines IL-12 or IL-18 that influence the tumor  
148 microenvironment and potentiate the antitumor response<sup>27,28</sup>. With these approaches secretion is not  
149 directed specifically towards cancer cells, which may result in toxicity to healthy cells and tissues. In  
150 contrast, our optimized killing strategy for CAR T cells delivers a pro-apoptotic molecule specifically into  
151 cancer cells that interacted with a CAR T cell. Due to the directed secretion that is limited to the immune  
152 synapse, toxicity to neighboring cells is expected to be minimal. To examine this in more detail, we  
153 tested NOXA-BCMA CAR T cell-mediated toxicity to non-targeted BM cells from MM patients in co-  
154 culture experiments. Although a clear reduction in MM cells could be measured comparing co-cultures  
155 with NOXA-BCMA versus iNOXA-BCMA CAR T cells, no differences in the viability of other healthy BM  
156 cells were observed (**Fig. 4a,b**). This indicates there is no apparent toxicity to non-targeted BM cells.  
157 While NOXA was predominantly localized to granules in transduced T cells (**Fig. 2c and Extended Data**  
158 **Fig. 3b**) or NK cells (**Extended Data Fig. 3c**), it is possible that a portion of the introduced NOXA mis-  
159 localizes to -or leaks from- cytotoxic granules, resulting in toxicity to the T cells themselves. Therefore,  
160 we examined viability of transduced NOXA-BCMA versus iNOXA-BCMA CAR T cells during a 2-month in  
161 vitro culture period but did not observe differences in viability, while CD4:CD8 ratios and transcript  
162 expression remain comparable (**Fig. 4c**). Moreover, we examined presence of transduced NOXA-BCMA

163 versus iNOXA-BCMA CAR T cells in blood and in the spleen of mice in a xenograft model that was  
164 previously outlined in **Fig. 3e-g**. This analysis reveals that addition of functional NOXA does not hamper  
165 in vivo persistence of BCMA CAR T cells (**Fig. 4d**).

166

## 167 **Discussion**

168 Collectively, our data show that, by making use of the natural properties of granzyme B, we can direct  
169 pro-apoptotic proteins, such as NOXA, specifically into MM cells upon interaction with BCMA CAR T  
170 cells and subsequently promote apoptosis. As a consequence there is improved killing of cancer cells  
171 and diminished primary resistance. Importantly, resistance of tumor cells to undergo apoptosis after  
172 CAR T cell treatment is an immune escape mechanism that is not only confined to MM<sup>2,3</sup>. Therefore,  
173 tumor cell killing by CAR T cells in general should be improved to create an optimal CAR T cell therapy  
174 for more indications. By arming CAR T cells with NOXA we have demonstrated the possibility to improve  
175 killing of cancer cells dependent on MCL-1 expression for survival. However, this approach might not  
176 be sufficient for other tumor types that are MCL-1-independent. Pro-apoptotic proteins, besides NOXA,  
177 specifically inhibiting other pro-survival BCL-2 family proteins can be used in this setting. Alternatively,  
178 additional proteins that promote apoptotic or immunogenic cell death can be used to arm engineered  
179 T or NK cells and increase therapy options in a tailor-made fashion. Next to promoting cell death  
180 directly, other processes can be manipulated in targeted cancer cells by activating kinases or pathways,  
181 as shown previously using a synthetic enzyme-armed killer (SEAKER) CAR T cell strategy<sup>29</sup>. To examine  
182 CAR T cell behavior in more detail our strategy can also be employed using fluorescent molecules as  
183 cargo. This approach allows quantification of cargo transfer in relation to CAR T cell activation status,  
184 cellular interaction time and serial killing efficacy, and may provide clues for further optimization of  
185 CAR T cell technology.

186

## 187 **Methods:**

188 **Cell culture and chemicals**

189 Cells were cultured in Dulbecco's Modified Eagle Medium (DMEM, Life Technologies) (Phoenix-Ampho,  
190 HEK293T), Iscove's Modified Dulbecco's Medium (IMDM, life Technologies) (OCI-Ly7), or RPMI 1640  
191 GlutaMAX HEPES culture medium (Life Technologies) (L363, U266, MM1s, RPMI8226-GFP-Luc2, YT-Indy  
192 and pMM), supplemented with 10-20% fetal bovine serum (FBS, Sigma) and 100 µg/ml penicillin-  
193 streptomycin (p/s, Gibco/Life Technologies). For H929 cells 50 µM β-mercaptoethanol (Life  
194 Technologies) was added and for primary MM the medium was supplemented with 100 ng/ml human  
195 recombinant IL-6 (Tebu Bio) and 100 ng/ml human recombinant APRIL/TNFSF-13 (R&D systems).  
196 Human healthy donor peripheral blood mononuclear cells (PBMC) were isolated from buffy coats  
197 (Sanquin, Amsterdam, the Netherlands) using Ficoll-Paque according to the manufacturer's protocol.  
198 PBMC were cultured in RPMI with 2.5% pooled AB+ human serum (IPLA-CSER, Innovative Research),  
199 50 µM β-mercaptoethanol (Life Technologies) and 1% p/s. All primary MM samples were obtained after  
200 written informed consent, and protocols were approved by the local ethics committee of the University  
201 Medical Center, Utrecht.

202

203 **Apoptosis staining and flow cytometry**

204 Assessment of cell viability was performed by staining with 20 nM TO-PRO-3 (Thermo Scientific) or with  
205 Fixable Viability Dye (FVD) eFluor506 or eFluor780 (eBioscience), followed by flow cytometric analysis  
206 (BD FACSCanto II or BD LSRFortessa, BD Biosciences). To determine the absolute amount of cells Flow  
207 count Fluorospheres were used (Beckman Coulter). In co-culture experiments, target cells were  
208 identified by flow cytometric surface staining with CD38-PE (Fisher) and CD138-PERCP-Cy5.5  
209 (Biolegend) (DL-101) (primary MM cells), or by staining with CellTrace Violet (Invitrogen) (MM cell lines)  
210 prior to adding effector cells. BCMA CAR T cells were characterized by staining with CD4-Pacific Blue  
211 (Biolegend) (RPA-T4), CD8-PE/Cy7 (BD) (SK1), and biotinylated human BCMA (Bio-connect) with  
212 streptavidin-PE (Thermo Fisher). For intracellular staining, cells were fixed and permeabilized using BD  
213 Cytofix/Cytoperm (BD Biosciences), and stained with mouse anti-MCL-1 (Abcam) (Y37), rabbit anti-HA-



214 TAG (CST) (C29F4), donkey anti-rabbit-IgG-Alexa Fluor 488 (Biolegend). Flow cytometry data analysis  
215 was performed using FlowJo.

216

### 217 **Generation of BCMA CAR T cells.**

218 The BCMA CAR construct (pBu-BCMA-CAR) was generated by cloning single chain variable fragments  
219 from anti-BCMA antibody into a pBullet vector containing a D8 $\alpha$ -41BB-CD3- $\zeta$  signaling cassette.  
220 Phoenix-Ampho packaging cells were transfected with gag-pol (pHit60), env (P-COLT-GALV) and pBu-  
221 BCMA-CAR, using Fugene HD transfection reagent (Promega). Human PBMC were pre-activated with  
222 30 ng/ml anti-CD3 (OKT3, Miltenyi) and 50 IU/ml IL-2 (Sigma) and subsequently transduced two times  
223 with viral supernatant in the presence of 6  $\mu$ g/ml polybrene (Sigma) and 50 U/ml IL-2. Transduced T  
224 cells were expanded using 50 U/ml IL-2 and anti CD3/CD28 dynabeads (Thermo Fisher), and BCMA-  
225 CAR-expressing cells were selected by treatment with 80  $\mu$ g/ml neomycin. T cells were further  
226 expanded using rapid expansion protocol as described elsewhere<sup>30</sup>. For transduction with our  
227 granzyme B – cargo – T2A - eGFP constructs, Gblocks (IDT) were cloned into lentiviral vector pCCL.  
228 Lentiviral particles were produced by transient transfection of the lentiviral vector and the packaging  
229 plasmids pRSV-Rev, pMDLg/pRRE, and pMD2-VSV-G to HEK293T cells using the CalPhos Mammalian  
230 Transfection Kit (Clontech Laboratories). Viral supernatants were filtered through 0.45  $\mu$ m low-protein-  
231 binding filters, concentrated by ultracentrifugation at 20,000  $\times$  g for 2 h, resuspended in StemMACS  
232 (Miltenyi Biotec), and stored at  $-80^{\circ}\text{C}$ . Previously transduced PBMC expressing a BCMA CAR were  
233 transduced with the granzyme B- cargo-expressing lentiviral vector and eGFP-positive BCMA CAR T cells  
234 were subsequently sorted (Sony MA900) and expanded on rapid expansion protocol.

235

### 236 **Animal model**

237 NOD.Cg-PrkdcscidII2rgtm1Wjl mice were ordered (Charles River) and temporarily housed in the Central  
238 Animal Facility of Utrecht University during the experiments. Experiments were conducted per  
239 institutional guidelines after obtaining permission from the local ethical committee, and performed in

240 accordance with the current Dutch laws on animal experimentation. Mice were housed in individually  
241 ventilated cage (IVC) system to maintain sterile conditions and fed with sterile food and water. After  
242 irradiation, mice were given the antibiotic ciproxin in the sterile water throughout the duration of the  
243 experiment. Female mice were randomized with equal distribution among the different groups, based  
244 on tumor size (measured with Bioluminescence Imaging (BLI) on day -1) into 5 mice/group. Age and  
245 weight of mice was comparable between groups. Adult NSG mice (6-9 weeks old) received sublethal  
246 total body irradiation (1,75 Gy) on day -22 followed by intravenous injection of  $5 \times 10^6$  RPMI-8226-  
247 luciferase tumor cells on day -21, and received 1 intravenous injection of  $0.8 \times 10^6$  NOXA BCMA CAR T  
248 cells or iNOXA BCMA CAR T cells on day 0. Together with the CAR T cell injection, all mice received  $0.6$   
249  $\times 10^6$  IU of IL-2 (Proleukin; Clinigen) in 100  $\mu$ l incomplete Freund's adjuvant (IFA). Mice were monitored  
250 at least twice a week for any symptoms of disease (sign of paralysis, weakness, and reduced motility),  
251 weight loss, and clinical appearance scoring (scoring parameter included hunched appearance, activity,  
252 fur texture, and piloerection). The humane endpoint was reached when mice showed the  
253 aforementioned symptoms of disease or experienced a 20% weight loss from the initial weight  
254 (measured on day 1). During the experiment tumor growth was monitored weekly by BLI measurement  
255 after intraperitoneal (IP) Luciferin (Promega) injection.

256

### 257 **Exogenous delivery of NOXA**

258 In order to determine the effect of NOXA mediated killing, the pore forming Streptolysin O (S5265-  
259 25KU, Sigma) was used to facilitate entry of exogenous NOXA into target cells. SLO was activated with  
260 10 mM DTT for 20 minutes at RT and subsequently diluted in serum-free RPMI. Target cells were  
261 incubated with SLO and synthetic NOXA or NOXA-TAMRA for 30 minutes at 37 °C, after which FBS-  
262 containing medium was added to inactivate the SLO. After 24h, apoptosis staining was performed to  
263 measure target cell viability using flow cytometry.

264

### 265 **Immunoblotting**

266 For western blot analysis, cells were lysed in buffer containing 1% NP-40 and proteins were separated  
267 using SDS-PAGE (Mini-PROTEAN® TGX™ Precast Gels, Bio-Rad), transferred to low fluorescence PVDF  
268 membranes (Bio-Rad), blocked in phosphate-buffered saline (PBS) containing 2% non-fat dry milk, and  
269 stained using the following antibodies: mouse anti- $\alpha$ -tubulin (Cell signaling technology) (DM1A),  
270 mouse anti-NOXA (Abcam) (114C307.1), rabbit anti-MCL-1 (Abcam) (Y37), goat anti-mouse-680RD, and  
271 goat anti-rabbit-800CW (LI-COR Biosciences). To enrich for MCL-1 binding protein immunoprecipitation  
272 was performed using the Dynabeads Protein G IP Kit (Invitrogen) following the manufacturer's protocol.  
273 Infrared imaging was used for detection (Odyssey Sa; LI-COR Biosciences). Analysis and quantification  
274 were performed using LI-COR Image Studio and ImageJ 1.47V software.

275

## 276 **Microscopy**

277 To visualize mScarlet, mNeogreen or NOXA, CAR-T cells were placed on coverslips containing 0.1%  
278 poly-L-lysine. Consequently, cells were fixed using 4% paraformaldehyde. For intracellular staining cells  
279 were blocked for 1 hour using a blocking buffer consisting of 2% BSA and 0.1% saponin in PBS, followed  
280 by 1-hour incubations with anti-LAMP-1 (BD or CST) (H4A3 or D2D11) or anti-HA tag (CST) (C29F4), in  
281 blocking buffer. After washing, the coverslips were mounted using ProLong™ Gold with DAPI  
282 (Invitrogen). For visualizing transfer of mScarlet or mNeogreen from BCMA CAR T cells into MM cells,  
283 target cells were stained using Vybrant™ DiO Dye prior to incubation with the effector cells. Cells were  
284 imaged using a 63 x oil lens (630 x total magnification) on a confocal microscope (Zeiss LSM710 (fixed)  
285 or Stellaris 5, Leica Microsystems (live imaging)). ImageJ was used to analyze the images.

286

## 287 **Statistical analysis**

288 Statistical analysis was performed using GraphPad Prism version 8.3. Unpaired groups were compared  
289 with a Student's t-test. For comparison of more than two groups, one-way or two-way ANOVA tests  
290 were used.

291

292 **Acknowledgments**

293 The authors thank the support facilities of the University Medical Center Utrecht. Synthetic NOXA and  
294 NOXA-TAMRA were kindly provided by Prof. dr. H. Ovaa, Department Cell and Chemical Biology, Leiden  
295 University Medical Centre, Leiden, The Netherlands. This work was financially supported by research  
296 grants from the Dutch Cancer Foundation (KWF)/Alpe d’HuZes Foundation (11270 and 13058 to V.P,  
297 and 14459 to M.C.) The funding agency played no role in the design, reviewing, or writing of the  
298 manuscript.

299

300

301 **Figure legends:**

302 **Figure 1. MCL-1 expression limits MM cell killing by BCMA CAR T cells.**

303 **A)** Graphical representation of experimental findings. **B)** Representative histograms showing MCL-1  
304 protein expression in viable L363 or H929 MM cells after 24 h co-culture with BCMA CAR T cells using  
305 indicated effector to target cell ratio’s (E:T) and measured by intracellular flow cytometry. The dotted  
306 line represents the median MCL-1 expression in untreated L363 or H929 cells. Grey indicates isotype  
307 control staining. **C)** Percentage of viable H929 (n = 5) or L363 (n = 4) cells with MCL-1 expression above  
308 the median expression in untreated cells, as shown in (B). Dots represent separate experiments with  
309 SEM. Statistical testing was performed using one-way ANOVA, followed by multiple comparison  
310 testing. **D)** Representative gating strategy of L363 MM cells co-cultured with CellTrace Violet (CTV)-  
311 labelled BCMA CAR-T cells and stained with nucleic acid dye TO-PRO-3, and measured by flow  
312 cytometry after 24 h of culture. Co-cultures were simultaneously incubated with 100 nM MCL-1  
313 inhibitor S63845 (lower panels) or without (upper panels). Indicated percentages of viable cells are  
314 calculated within CTV-negative MM cells. **E)** Quantified specific apoptosis of L363 or H929 cells as  
315 detailed for (D) and by using the gating strategy shown in (D). Percentages were calculated based on  
316 absolute cell numbers using counting beads. Specific apoptosis was determined by measuring the  
317 altered percentage of TO-PRO-3<sup>+</sup> (live) cells compared with untreated cells and was defined as follows:  
318  $([\% \text{ cell death in treated cells} - \% \text{ cell death in control}] / \% \text{ viable cells control}) \times 100$ . For H929 a

319 concentration of 10 nM MCL-1i and for L363 a concentration of 100nM MCL-1i was used. Dots show  
320 averages of separate experiments with L363 (n = 6) or H929 (n = 3) with SEM. Statistical testing was  
321 performed using a paired t-test. **F)** SDS-PAGE electrophoresis of NP40 lysates from L363 MM cells  
322 treated with 15 ng/ml SLO, with or without 10  $\mu$ M synthetic NOXA, stained for NOXA, MCL-1 and  $\alpha$ -  
323 tubulin as control. Left panel shows the untreated lysates before immunoprecipitation (pre IP) and the  
324 right panel shows the cell lysates after immunoprecipitation with MCL-1 or control (IgG) antibodies  
325 (post- IP). **G)** Percentage of viable (DiOC6(3)<sup>+</sup>TO-PRO-3<sup>-</sup>) L363 MM cells treated with 15 ng/ml SLO, with  
326 or without 8  $\mu$ M synthetic NOXA and analyzed by flow cytometry. Shown are averages of 5 biological  
327 replicates with SEM. Statistical analysis was performed using a one-way ANOVA with Geisser-  
328 Greenhouse correction.

329

330 **Figure 2. BCMA CAR T cells can be equipped with fluorescent cargo that is transferred to MM cells**  
331 **upon cell-cell interaction.**

332 **A)** Graphical representation of experimental findings. **B)** Construct design with cargo proteins fused  
333 to granzyme B through a GC linker that contains a cathepsin B cleavage site. **C)** Representative confocal  
334 images (630 x oil-magnification) of BCMA CAR T cells transduced with the lentiviral construct shown in  
335 (B) and stained for late endosomal marker LAMP-1 and DAPI. **(D)** Representative image of eGFP and  
336 mScarlet fluorescence in viable U266 MM cells (grey) when co-cultured with WT (blue) or mScarlet<sup>+</sup>  
337 (red) BCMA CAR T cells for 24 h in a 1:5 E:T cell ratio. Fluorescence signals of WT or mScarlet<sup>+</sup> BCMA  
338 CAR T cells were used as overlay in these plots to indicate range of eGFP and mScarlet expression. **E,**  
339 **F)** Mean fluorescence intensity (MFI) of mScarlet (E) or eGFP (F) in the total viable population of  
340 indicated target MM cell lines when co-cultured for 6, 16 or 24 h with WT (-) or mScarlet<sup>+</sup> (+) BCMA  
341 CAR T cells in a 1:5 E:T cell ratio. The experiment was performed in the presence of 10  $\mu$ M caspase  
342 inhibitor Q-VD-OPh to inhibit apoptosis of target cells. Statistical analysis was performed using a paired  
343 T-test.

344

345 **Figure 3. BCMA CAR T cells armed with NOXA show improved killing of MM cells.**

346 **A)** Graphical representation of optimized killing strategy by CAR T cells. **B)** Construct design with pro-  
347 apoptotic NOXA (active) or mutated NOXA (inactive) as cargo proteins fused to granzyme B. **C)** Specific  
348 apoptosis induced in H929 cells after 24 h of co-culture with NOXA-BCMA CAR T cells or iNOXA-BCMA  
349 CAR T cells at indicated E:T cell ratios. Values are average of 7 independent experiments with SEM.  
350 Statistical testing was performed using a two-way ANOVA followed by a Sidak's multiple comparison  
351 test. **D)** Specific apoptosis induced in primary CD38<sup>+</sup>CD138<sup>+</sup> MM cells after 48 hours of co-culture with  
352 NOXA-BCMA CAR T cells or iNOXA-BCMA CAR T cells at indicated E:T cell ratios. Dots represent  
353 different primary MM patient samples. Statistical testing was performed using a two-way ANOVA  
354 followed by a Sidak's multiple comparison test. **E)** Experimental setup of xenograft mouse experiment  
355 where NSG mice are i.v. injected with RPMI8226-eGFP-Luc2 MM cells, followed by i.v. injection of  
356 indicated BCMA CAR T cells ( $0.8 \times 10^6$ , with a 1:1 CD4:CD8 ratio) 21 days later. **F)** Average  
357 bioluminescence intensity (BLI) (flux p/s) of mice treated with NOXA-BCMA or iNOXA-BCMA CAR T over  
358 time with SEM. Statistical testing was performed using a mixed effect model **G)** Corresponding BLI  
359 images of mice shown in (F).

360

361 **Figure 4. NOXA cargo does not impair viability of transduced BCMA CAR T cells and does not show**  
362 **off-target toxicity.**

363 **A)** Representative density plots showing cell viability (TO-PRO-3 staining) of primary bone marrow  
364 stromal cells (CD38<sup>-</sup>) or MM (CD38<sup>+</sup>) cells after 48 h of co-culture with iNOXA-BCMA or NOXA-BCMA  
365 CAR T cells in a 1:5 E:T cell ratio or without BCMA CAR T cells (0:1 E:T). **B)** Quantification of data shown  
366 in (A) with each dot representing a different MM patient sample co-cultured with iNOXA-BCMA or  
367 NOXA-BCMA CAR T cells at indicated E:T ratios for 48 h. Statistical testing was performed using a two-  
368 way ANOVA followed by a Sidak's multiple comparison test. **C)** Plots showing total BCMA CAR T cell  
369 viability (TO-PRO-3-negative, left panel), percentage of CD8 (center left panel) and transcript (eGFP)

370 expression in CD4<sup>+</sup> (center right panel) and CD8<sup>+</sup> (right panel) iNOXA-BCMA or NOXA-BCMA CAR T cells  
371 and cultured for 1 – 7 weeks after CAR T cell transduction. Every dot represents a separate experiment  
372 with SEM. Statistical testing was performed using one-way ANOVA. **D)** Number of CD4<sup>+</sup> and CD8<sup>+</sup>  
373 iNOXA-BCMA or NOXA-BCMA CAR T cells in blood at 3 (left panel) or 9 (center panel) days, or in the  
374 spleen (days 25-27, right panel), after i.v. injection in mice as outlined in figure 3E and F. Statistical  
375 testing was performed using one-way ANOVA, followed by multiple comparison testing.

376

377 Extended Data Figure 1. **Exogenous NOXA induces apoptosis in L363 and OCI-Ly10 cells.**

378 **A,B)** Representative confocal image (630 x oil magnification) showing A) L363 MM cells incubated with  
379 10  $\mu$ M synthetic NOXA-TAMRA with or without 15 ng/ml streptolysin O (SLO) and B) OCI-Ly10 DLBCL  
380 cells with 10  $\mu$ M synthetic NOXA-TAMRA with or without 30 ng/ml streptolysin O (SLO). **C)** Apoptosis  
381 induced by synthetic NOXA in L363 MM cells treated with 15 ng/ml SLO or without SLO, analyzed by  
382 flow cytometry with viability dyes TO-PRO-3 and DiOC6(3). Shown are averages of 5 biological  
383 replicates with SEM. Statistical analysis was performed using a two-way ANOVA followed by multiple  
384 comparison testing. **D)** Apoptosis induced by synthetic NOXA in OCI-Ly10 DLBCL cells treated with 30  
385 ng/ml SLO or without SLO, analyzed by flow cytometry with viability dyes TO-PRO-3 and DiOC6(3).  
386 Shown are averages of 5 biological replicates with SEM. Statistical analysis was performed using a two-  
387 way ANOVA followed by multiple comparison testing. **E)** Percentage of viable (DiOC6(3)<sup>+</sup>TO-PRO-3<sup>-</sup>)  
388 OCI-Ly10 DLBCL cells treated with 30 ng/ml SLO, with or without 8  $\mu$ M synthetic NOXA and analyzed  
389 by flow cytometry. Statistical analysis was performed using a one-way ANOVA with Geisser-  
390 Greenhouse correction.

391

392 Extended Data Figure 2. **Visualizing fluorescent cargo from BCMA CAR T cells to targeted MM cells.**

393 **A)** Construct design with fluorescent mNeongreen fused to granzyme B. **B)** Brightfield images  
394 combined with fluorescent intensity of mNeongreen (green) of H929 MM cells pre-treated with 10  $\mu$ M

395 Q-VD-Oph and co-cultured with BCMA CAR T cells transduced with construct shown in (G) in a 1:1 E:T  
396 ratio (confocal microscopy 630 x oil magnification). Images were taken with a 30 second interval.

397

398 Extended Data Figure 3. **NOXA localizes to LAMP-1-positive cytotoxic granules in transduced primary**  
399 **CD8<sup>+</sup> cells and NK cells.**

400 **A)** Representative flow cytometry staining of CD8<sup>+</sup> BCMA CAR T cells lentivirally transduced with a GzB-  
401 NOXA-T2A-eGFP construct (NOXA-BCMA CAR T cells) as shown in Figure 3B and stained with an anti-  
402 HA antibody. **B)** Representative image-based flow cytometry image captures by ImageStream at 60x  
403 magnification of transduced CD8<sup>+</sup> BCMA CAR T as in (A) and stained with antibodies against HA and  
404 LAMP-1 or CD8. **C)** Representative immuno-fluorescent staining of YT-Indy cells NK cells lentivirally  
405 transduced with GzB-NOXA-T2A-eGFP or GzB-iNOXA-T2A-eGFP constructs as shown in Figure 3B for  
406 late endosomal marker LAMP-1 and HA (to visualize the HA-tag coupled to NOXA or iNOXA), and  
407 analyzed by confocal microscopy (630 x oil-magnification).

408

409 Extended Data Figure 4. **BCMA CAR T cells or NK cells armed with NOXA show improved killing of**  
410 **MM or DLBCL cells.**

411 **A)** Specific apoptosis as measured by TO-PRO-3 expression using flow cytometry induced in RPMI-  
412 8226-GFP-Luc2 cells after 24 h of co-culture with iNOXA-BCMA or NOXA-BCMA CAR T cells at indicated  
413 E:T cell ratios. Values are average of 4 independent experiments with SEM. Statistical testing was  
414 performed using a two-way ANOVA followed by a Sidak's multiple comparison test. **B)** Specific  
415 apoptosis induced in H929 MM cells after 4 h of co-culture with YT-Indy NK cells lentivirally transduced  
416 with GzB-NOXA-T2A-eGFP or GzB-iNOXA-T2A-eGFP constructs as shown in Figure 3B at indicated E:T  
417 cell ratios. Values are average of 3 independent experiments with SEM. Statistical testing was  
418 performed using a two-way ANOVA followed by a Sidak's multiple comparison test. **C)** Specific



419 apoptosis induced in OCI-Ly7 DLBCL cells after 4 h of co-culture YT-Indy cells NK cells lentivirally  
420 transduced with GzB-NOXA-T2A-eGFP or GzB-iNOXA-T2A-eGFP constructs as shown in Figure 3B at  
421 indicated E:T cell ratios. Values are average of 3 independent experiments with SEM. Statistical testing  
422 was performed using a two-way ANOVA followed by a Sidak's multiple comparison test.

423

#### 424 **References:**

- 425 1. Majzner, R.G. & Mackall, C.L. Clinical lessons learned from the first leg of the CAR T cell  
426 journey. *Nat Med* **25**, 1341-1355 (2019).
- 427 2. Melenhorst, J.J. *et al.* Decade-long leukaemia remissions with persistence of CD4(+) CAR T  
428 cells. *Nature* **602**, 503-509 (2022).
- 429 3. Sakemura, R. *et al.* Targeting cancer-associated fibroblasts in the bone marrow prevents  
430 resistance to CART-cell therapy in multiple myeloma. *Blood* **139**, 3708-3721 (2022).
- 431 4. Larson, R.C. & Maus, M.V. Recent advances and discoveries in the mechanisms and functions  
432 of CAR T cells. *Nat Rev Cancer* **21**, 145-161 (2021).
- 433 5. Newick, K., O'Brien, S., Moon, E. & Albelda, S.M. CAR T Cell Therapy for Solid Tumors. *Annu*  
434 *Rev Med* **68**, 139-152 (2017).
- 435 6. Lee, Y.G. *et al.* Modulation of BCL-2 in Both T Cells and Tumor Cells to Enhance Chimeric  
436 Antigen Receptor T-cell Immunotherapy against Cancer. *Cancer Discov* **12**, 2372-2391 (2022).
- 437 7. Yan, X. *et al.* Identification of NOXA as a pivotal regulator of resistance to CAR T-cell therapy  
438 in B-cell malignancies. *Signal Transduct Target Ther* **7**, 98 (2022).
- 439 8. Dufva, O. *et al.* Integrated drug profiling and CRISPR screening identify essential pathways for  
440 CAR T-cell cytotoxicity. *Blood* **135**, 597-609 (2020).
- 441 9. Singh, N. *et al.* Impaired Death Receptor Signaling in Leukemia Causes Antigen-Independent  
442 Resistance by Inducing CAR T-cell Dysfunction. *Cancer Discov* **10**, 552-567 (2020).
- 443 10. Kimman, T. *et al.* Serpin B9 controls tumor cell killing by CAR T cells. *J Immunother Cancer* **11**  
444 (2023).
- 445 11. Tiedemann, R.E. *et al.* Identification of molecular vulnerabilities in human multiple myeloma  
446 cells by RNA interference lethality screening of the druggable genome. *Cancer Res* **72**, 757-  
447 768 (2012).
- 448 12. Slomp, A. & Peperzak, V. Role and Regulation of Pro-survival BCL-2 Proteins in Multiple  
449 Myeloma. *Front Oncol* **8**, 533 (2018).
- 450 13. Wuillème-Toumi, S. *et al.* Mcl-1 is overexpressed in multiple myeloma and associated with  
451 relapse and shorter survival. *Leukemia* **19**, 1248-1252 (2005).
- 452 14. Kotschy, A. *et al.* The MCL1 inhibitor S63845 is tolerable and effective in diverse cancer  
453 models. *Nature* **538**, 477-482 (2016).

- 454 15. Slomp, A. *et al.* Multiple myeloma with 1q21 amplification is highly sensitive to MCL-1  
455 targeting. *Blood Adv* **3**, 4202-4214 (2019).
- 456 16. Peperzak, V. *et al.* Mcl-1 is essential for the survival of plasma cells. *Nat Immunol* **14**, 290-297  
457 (2013).
- 458 17. Vikstrom, I. *et al.* Mcl-1 is essential for germinal center formation and B cell memory. *Science*  
459 **330**, 1095-1099 (2010).
- 460 18. Opferman, J.T. *et al.* Obligate role of anti-apoptotic MCL-1 in the survival of hematopoietic  
461 stem cells. *Science* **307**, 1101-1104 (2005).
- 462 19. Opferman, J.T. *et al.* Development and maintenance of B and T lymphocytes requires  
463 antiapoptotic MCL-1. *Nature* **426**, 671-676 (2003).
- 464 20. Rinckenberger, J.L., Horning, S., Klocke, B., Roth, K. & Korsmeyer, S.J. Mcl-1 deficiency results  
465 in peri-implantation embryonic lethality. *Genes Dev* **14**, 23-27 (2000).
- 466 21. Wang, X. *et al.* Deletion of MCL-1 causes lethal cardiac failure and mitochondrial dysfunction.  
467 *Genes Dev* **27**, 1351-1364 (2013).
- 468 22. Rasmussen, M.L. *et al.* MCL-1 Inhibition by Selective BH3 Mimetics Disrupts Mitochondrial  
469 Dynamics Causing Loss of Viability and Functionality of Human Cardiomyocytes. *iScience* **23**,  
470 101015 (2020).
- 471 23. Tantawy, S.I., Timofeeva, N., Sarkar, A. & Gandhi, V. Targeting MCL-1 protein to treat cancer:  
472 opportunities and challenges. *Front Oncol* **13**, 1226289 (2023).
- 473 24. Gomez-Bougie, P. *et al.* Noxa up-regulation and Mcl-1 cleavage are associated to apoptosis  
474 induction by bortezomib in multiple myeloma. *Cancer Res* **67**, 5418-5424 (2007).
- 475 25. Guikema, J.E., Amiot, M. & Eldering, E. Exploiting the pro-apoptotic function of NOXA as a  
476 therapeutic modality in cancer. *Expert Opin Ther Targets* **21**, 767-779 (2017).
- 477 26. Czabotar, P.E. *et al.* Structural insights into the degradation of Mcl-1 induced by BH3  
478 domains. *Proc Natl Acad Sci U S A* **104**, 6217-6222 (2007).
- 479 27. Pegram, H.J. *et al.* Tumor-targeted T cells modified to secrete IL-12 eradicate systemic  
480 tumors without need for prior conditioning. *Blood* **119**, 4133-4141 (2012).
- 481 28. Hu, B. *et al.* Augmentation of Antitumor Immunity by Human and Mouse CAR T Cells  
482 Secreting IL-18. *Cell Rep* **20**, 3025-3033 (2017).
- 483 29. Gardner, T.J. *et al.* Engineering CAR-T cells to activate small-molecule drugs in situ. *Nat Chem*  
484 *Biol* **18**, 216-225 (2022).
- 485 30. Marco-Malina, V. *et al.* Redirecting  $\alpha\beta$  T cells against cancer cells by transfer of a broadly  
486 tumor-reactive  $\gamma\delta$ T-cell receptor. *Blood* **118**, 50-59 (2011).

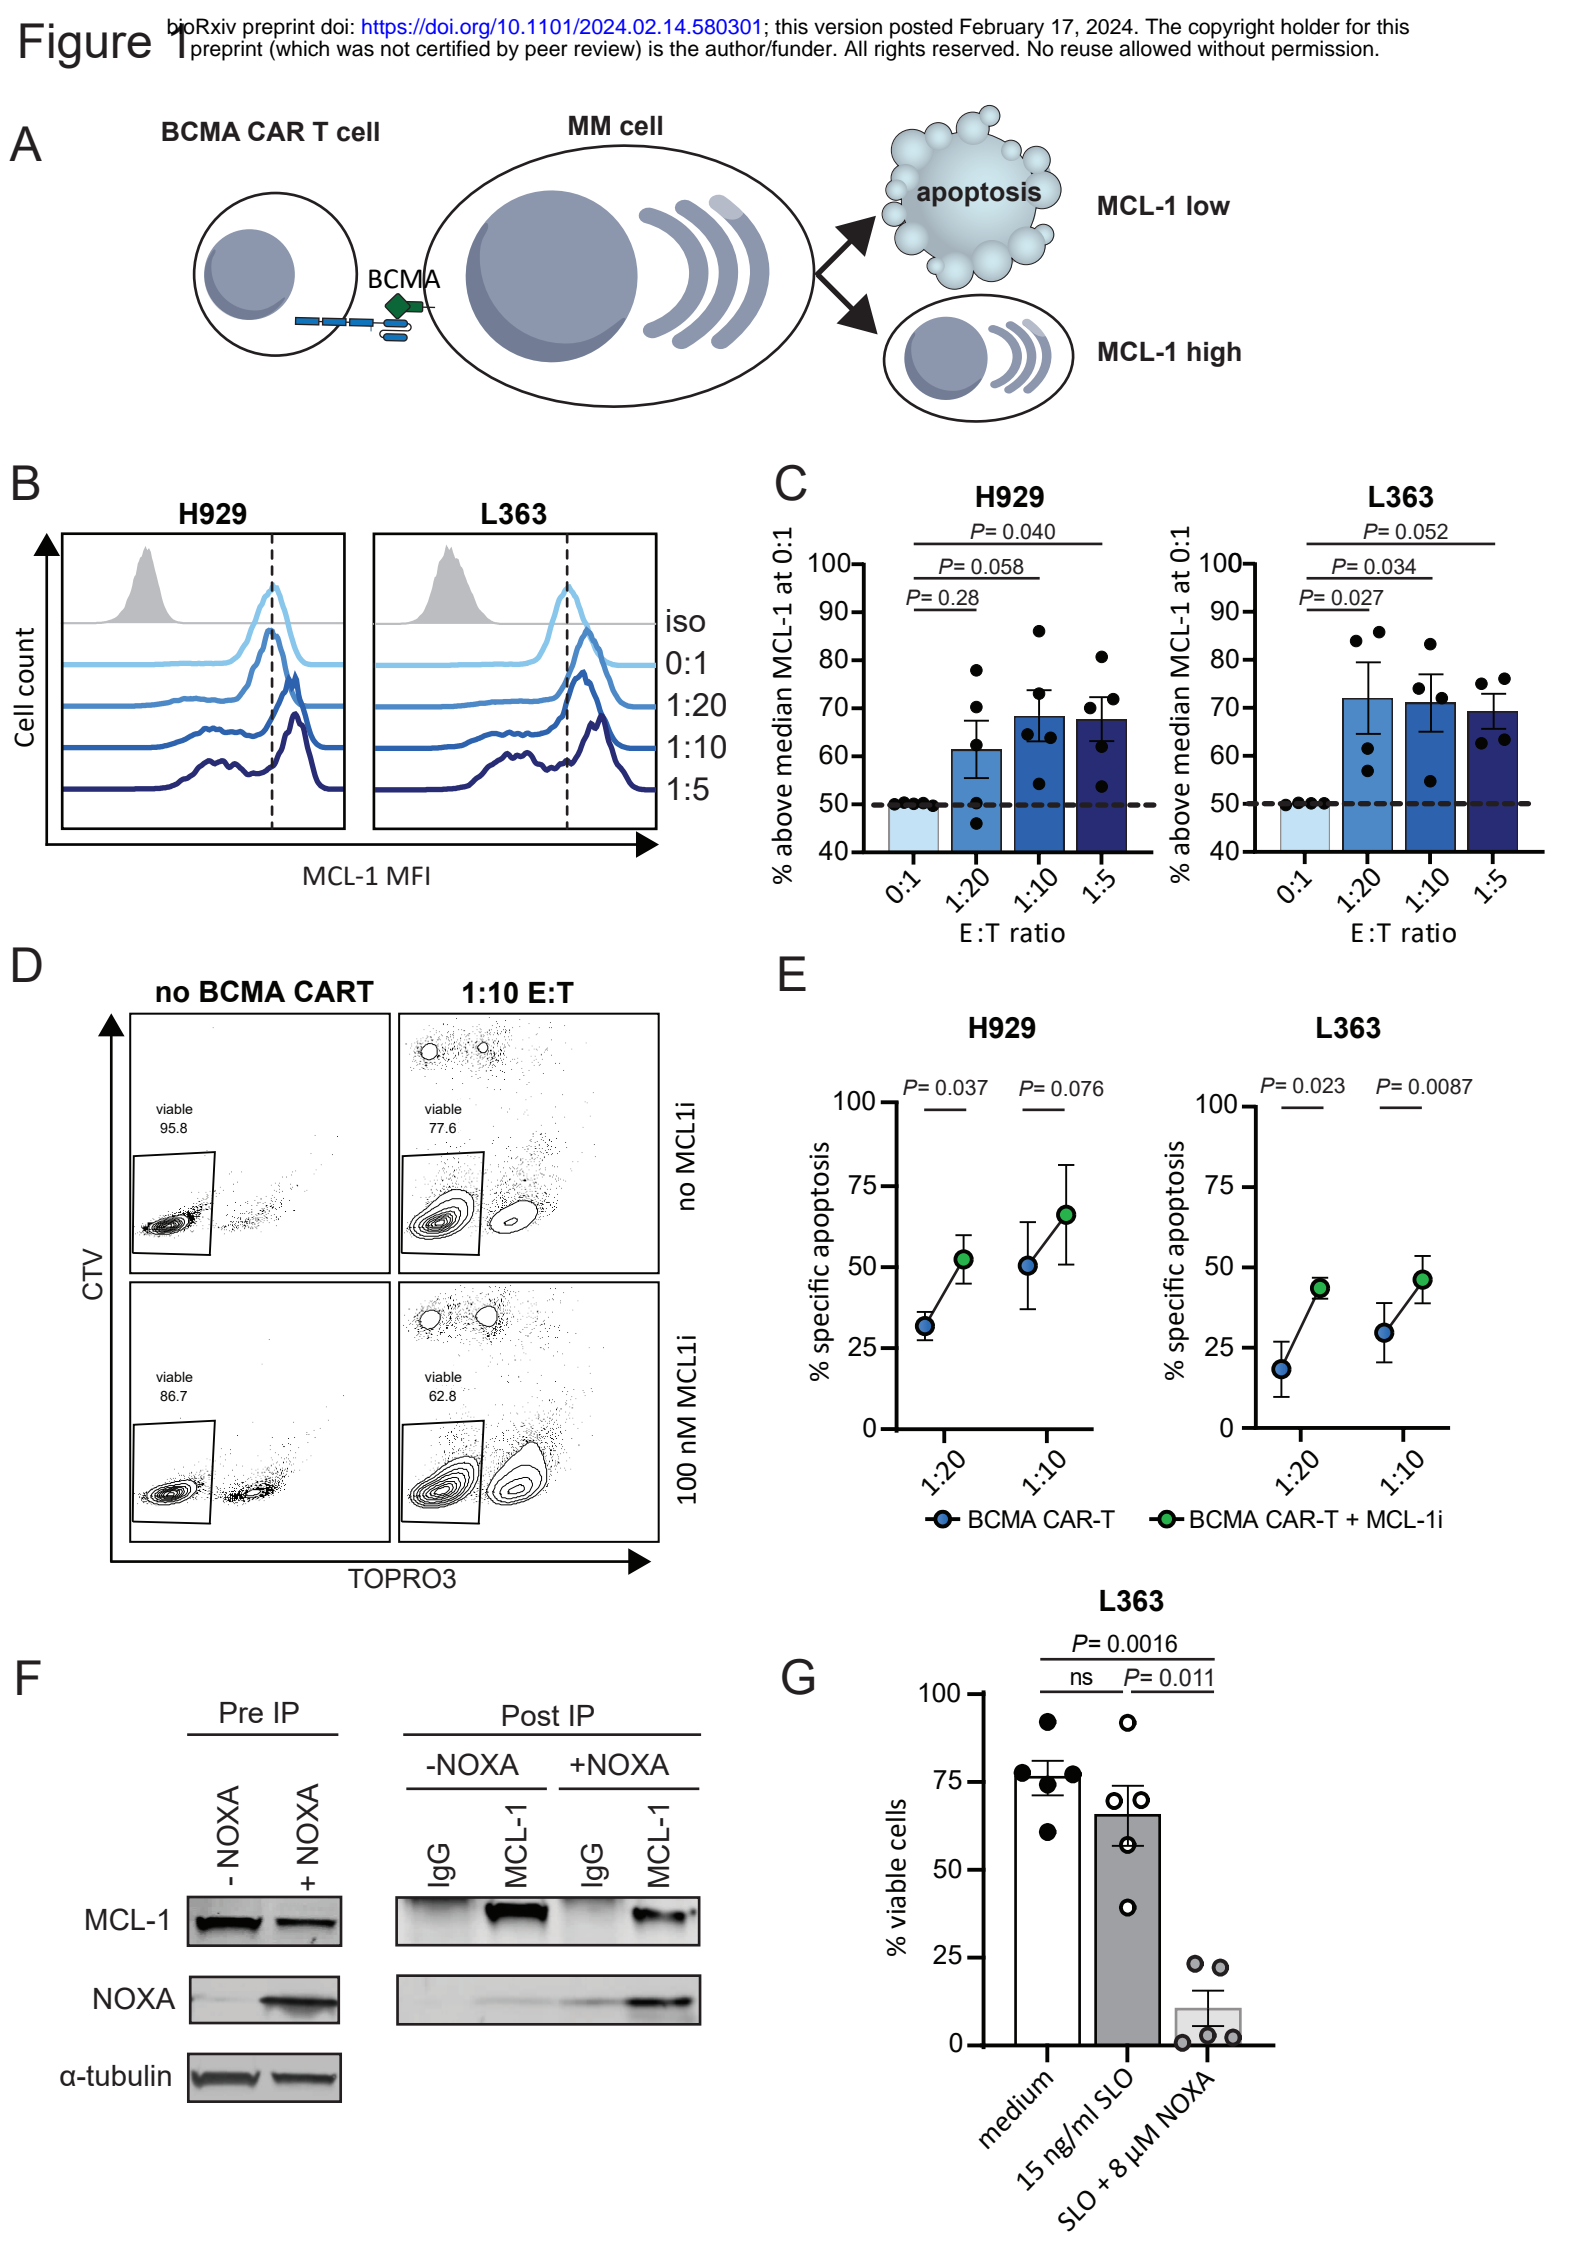

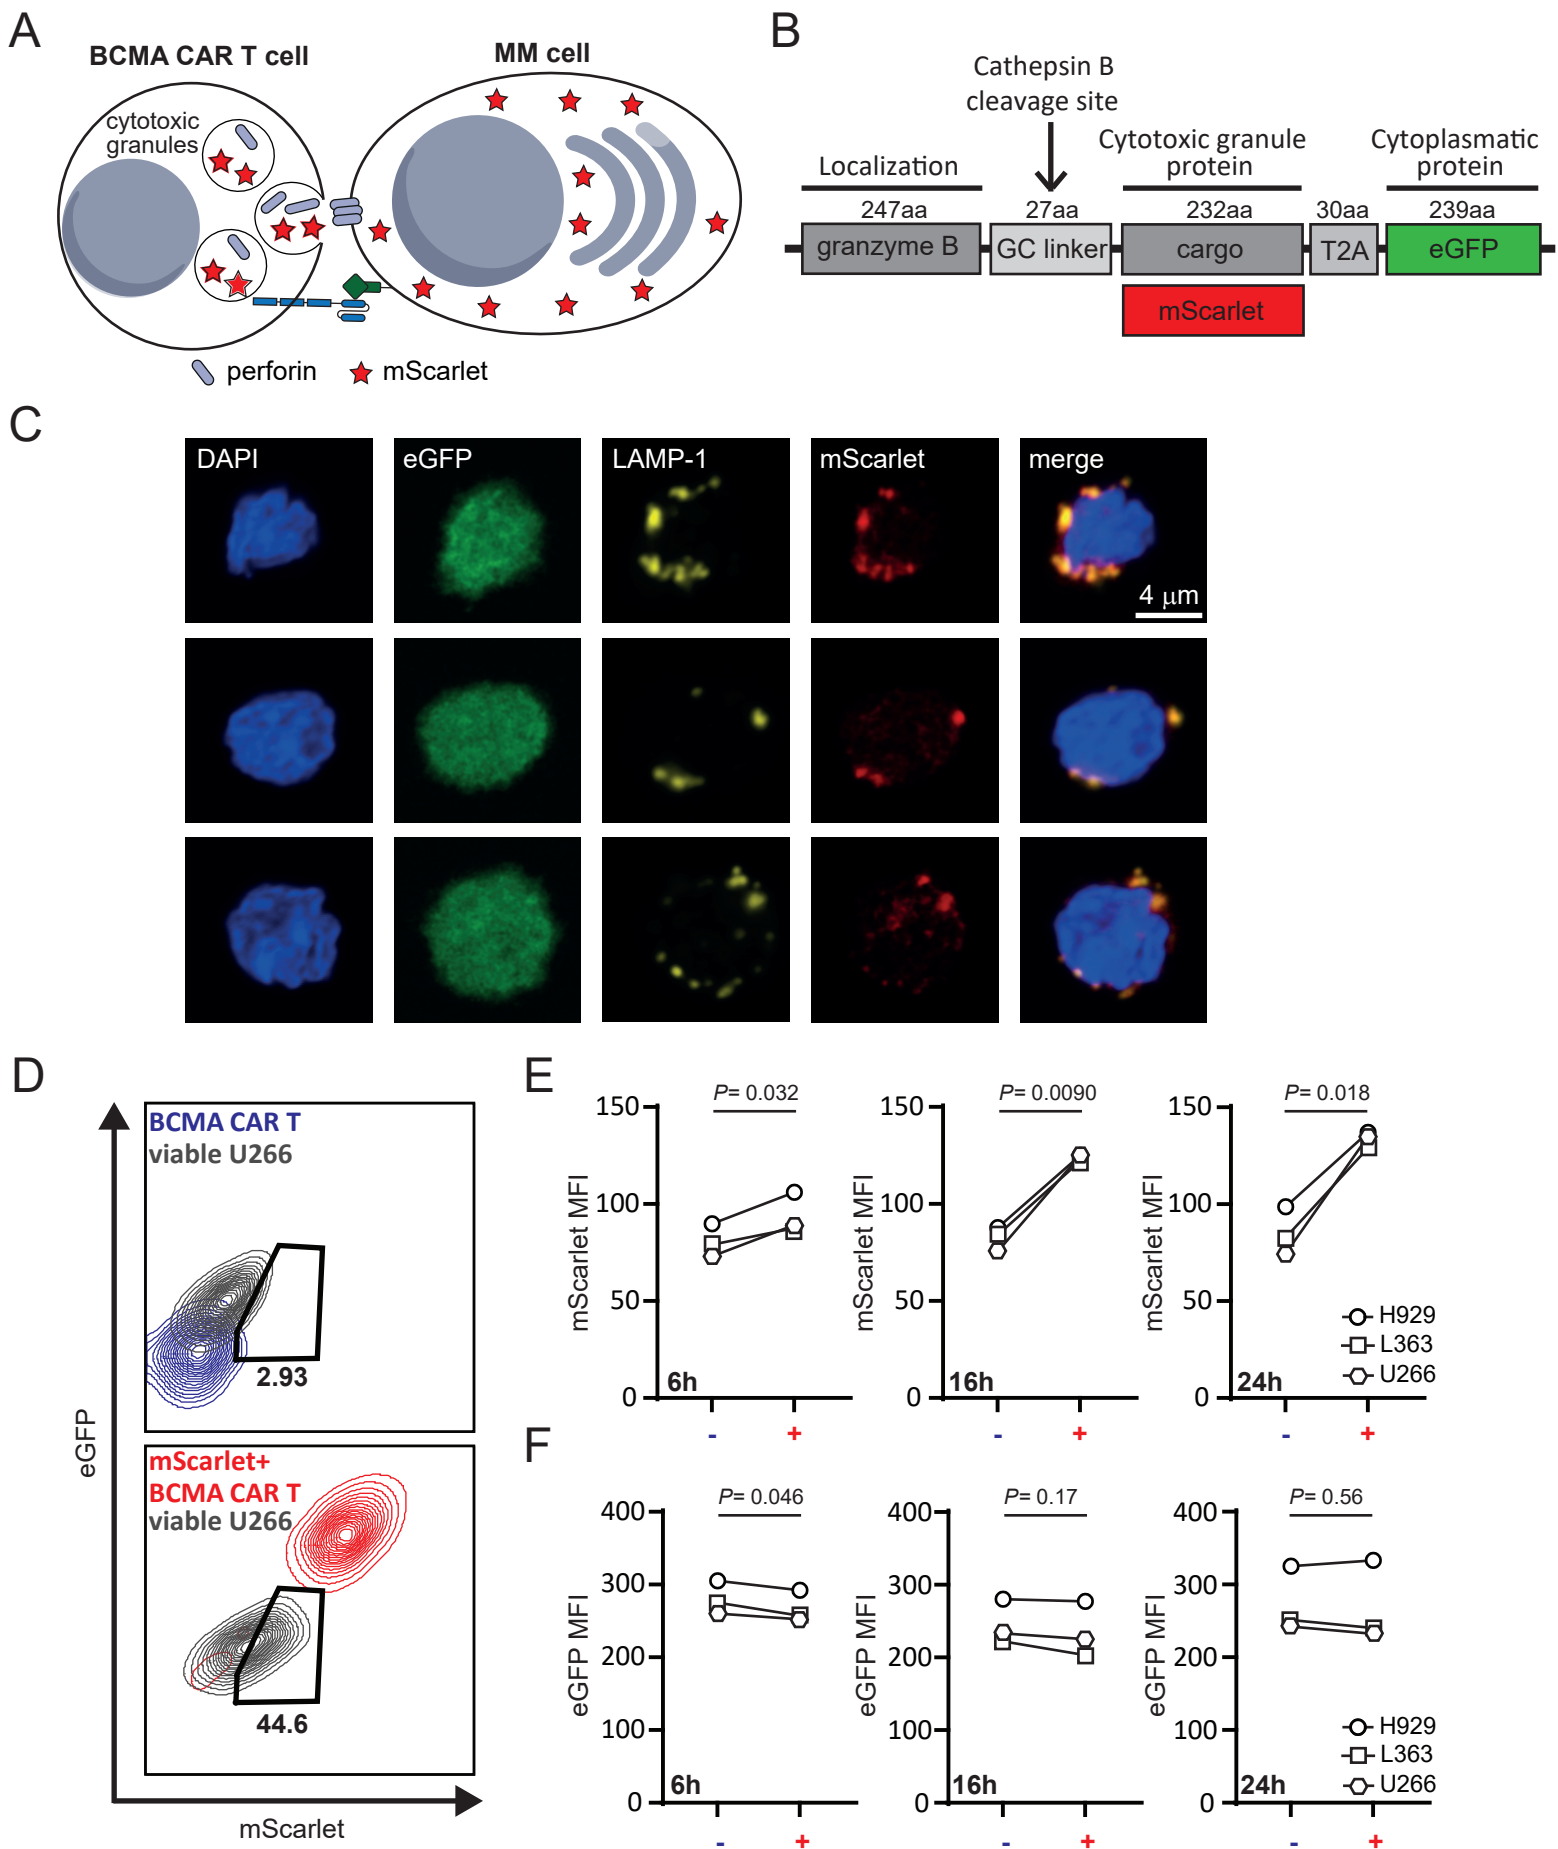

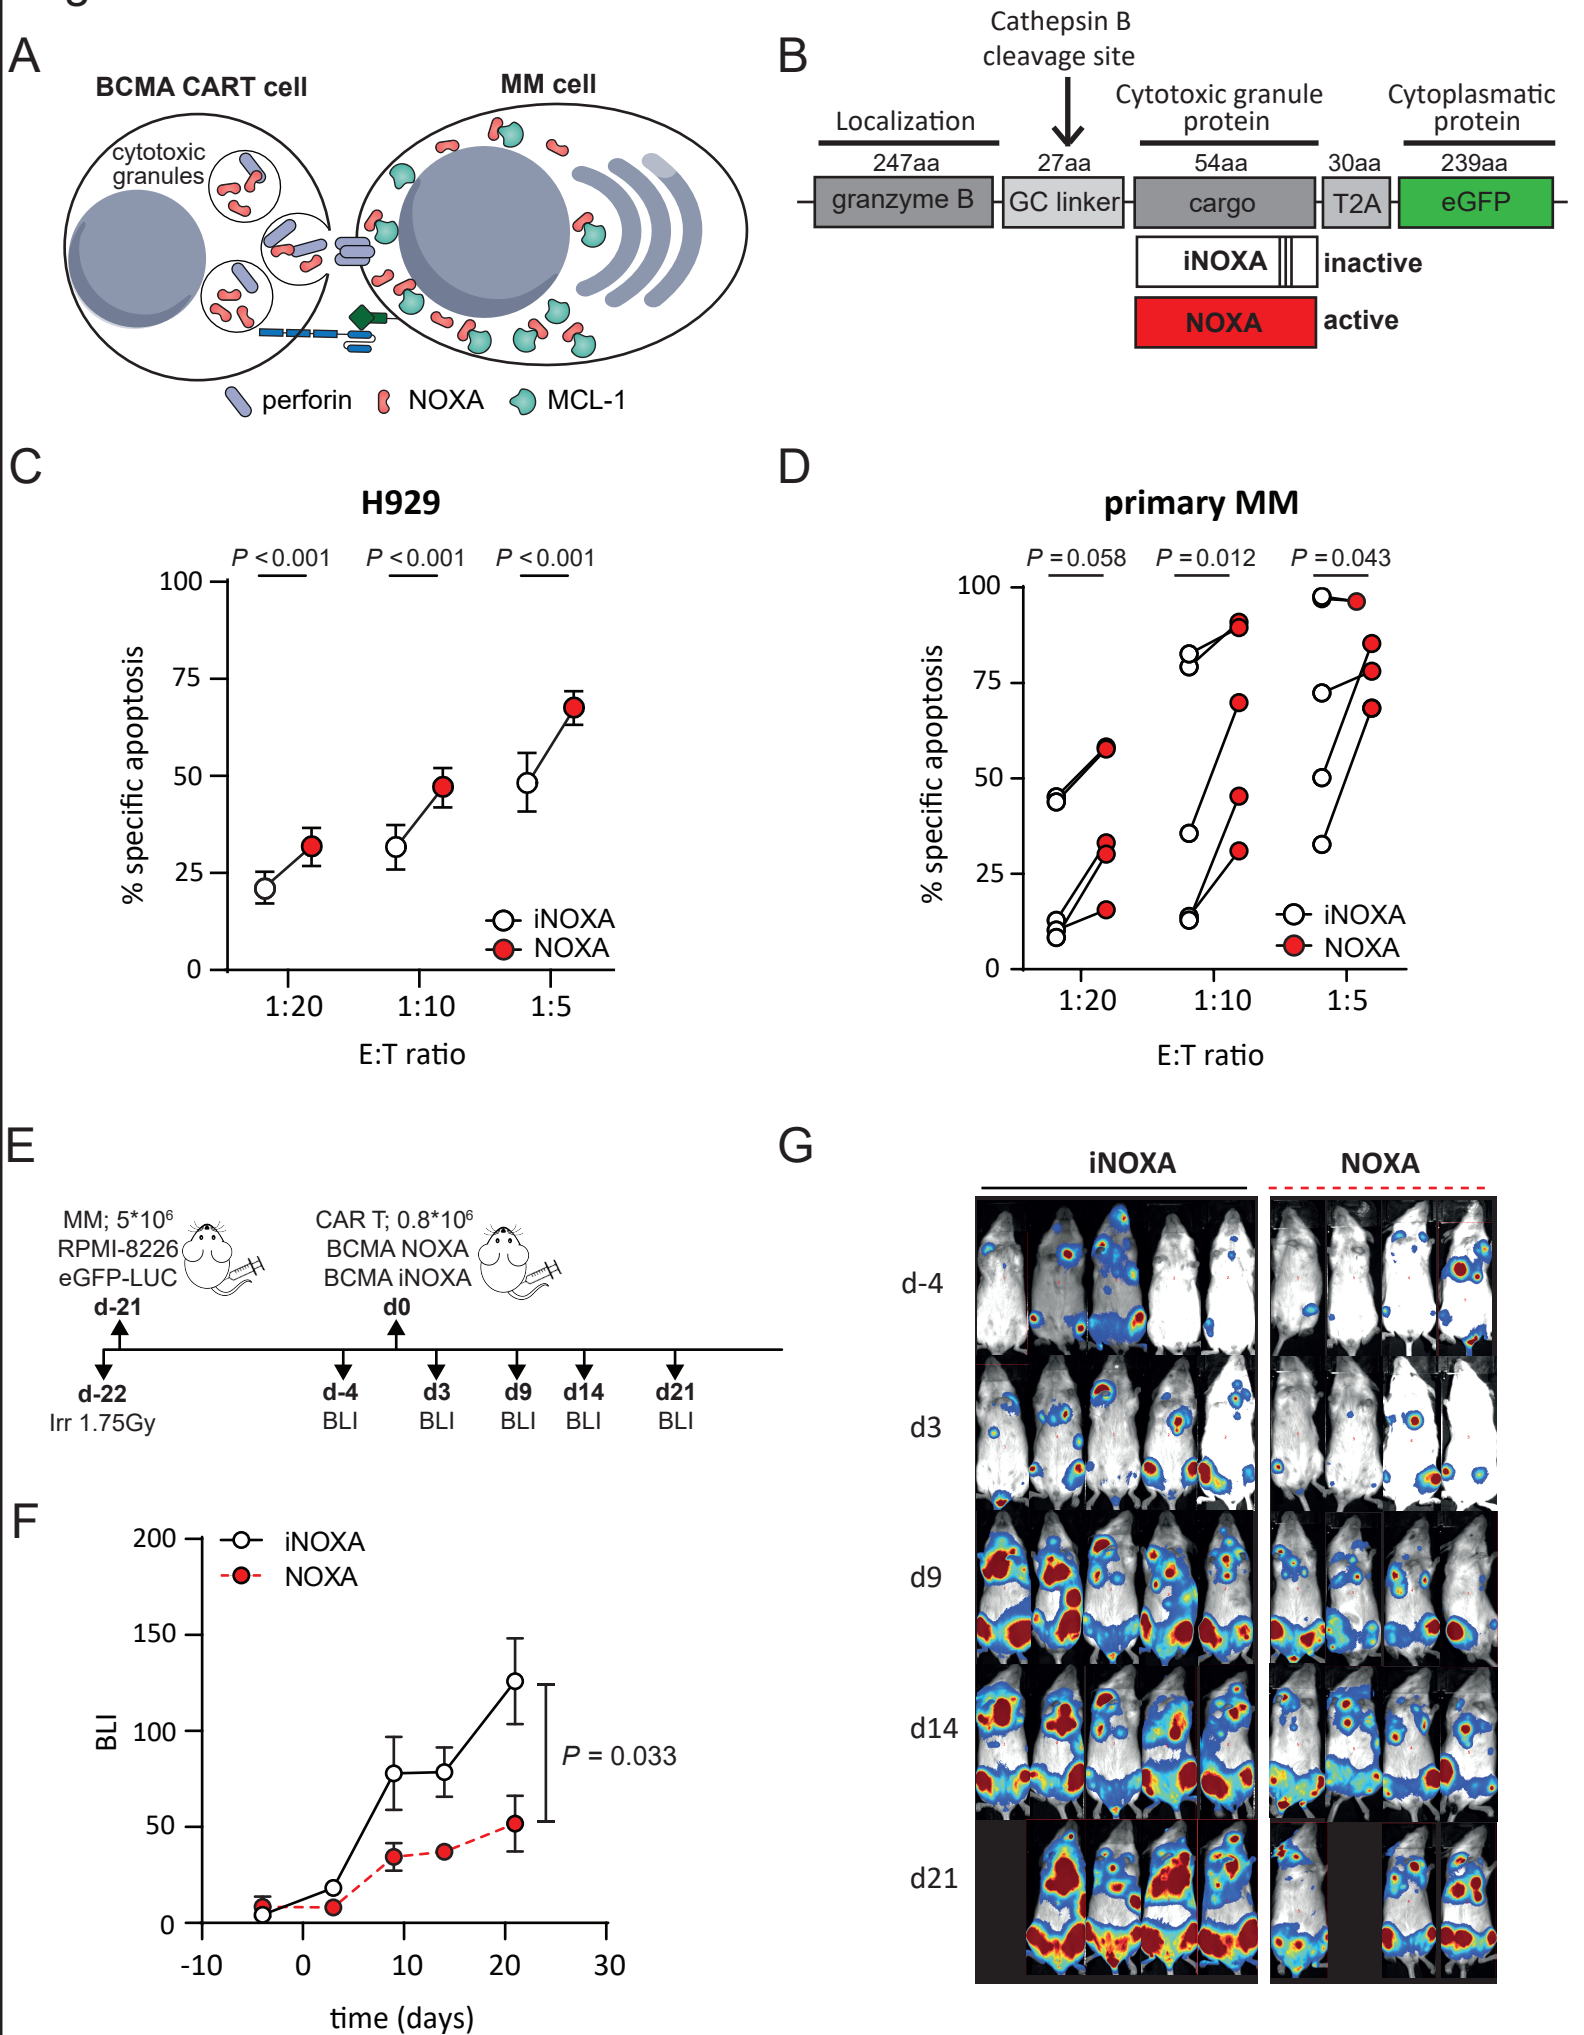

Figure 4

A

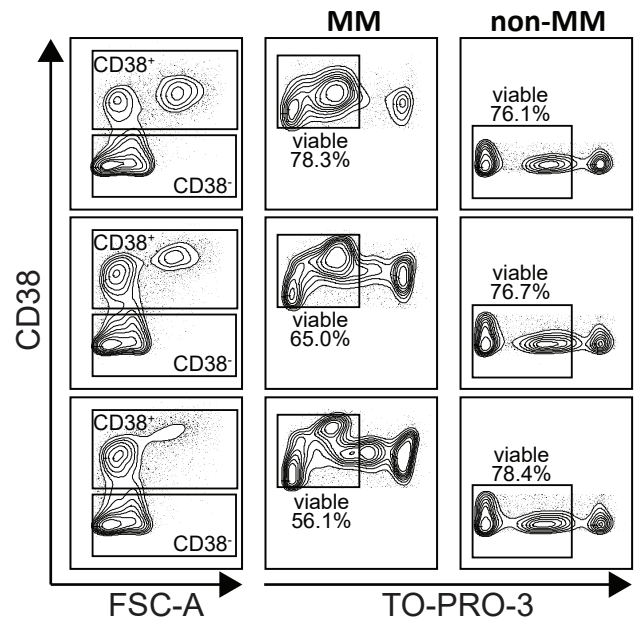

B

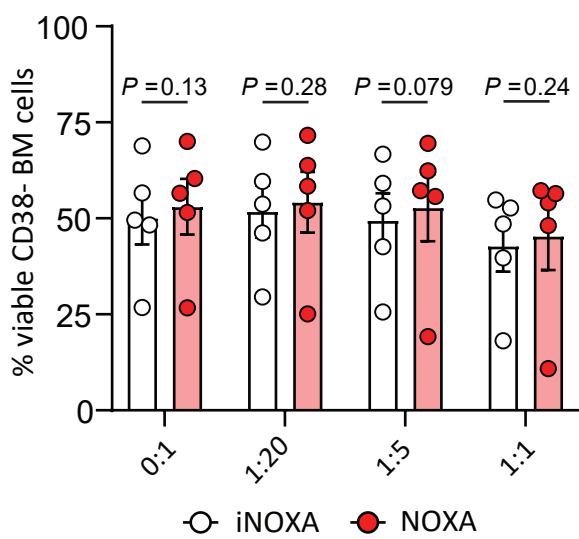

C

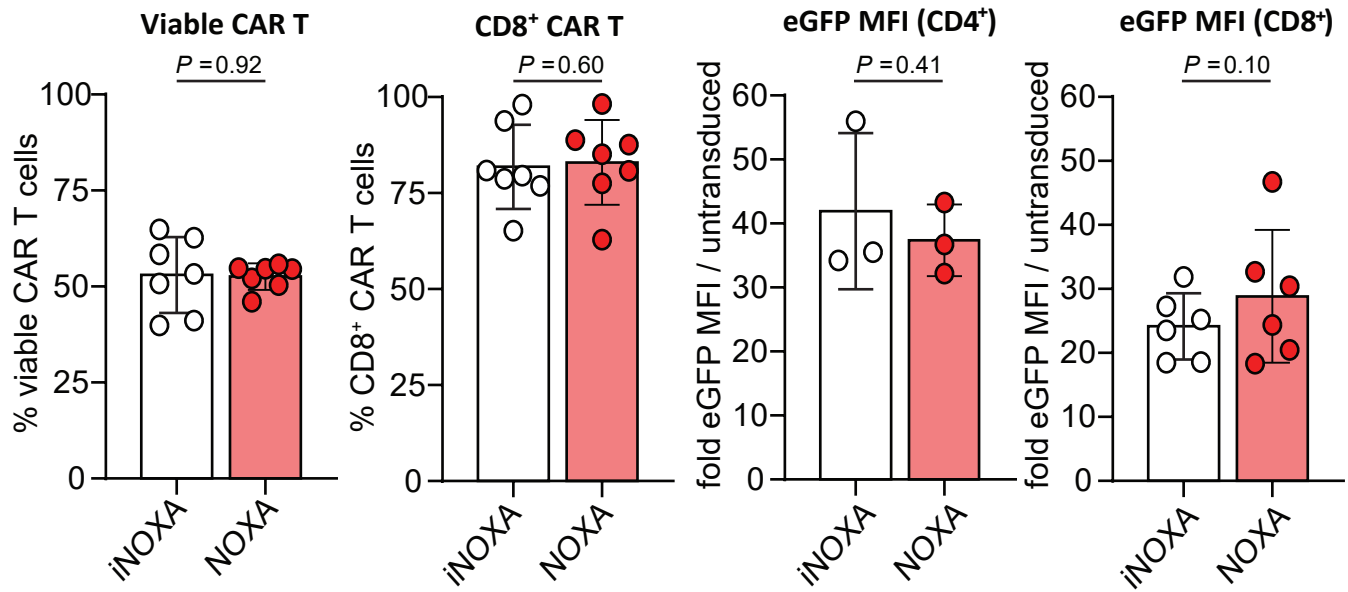

D

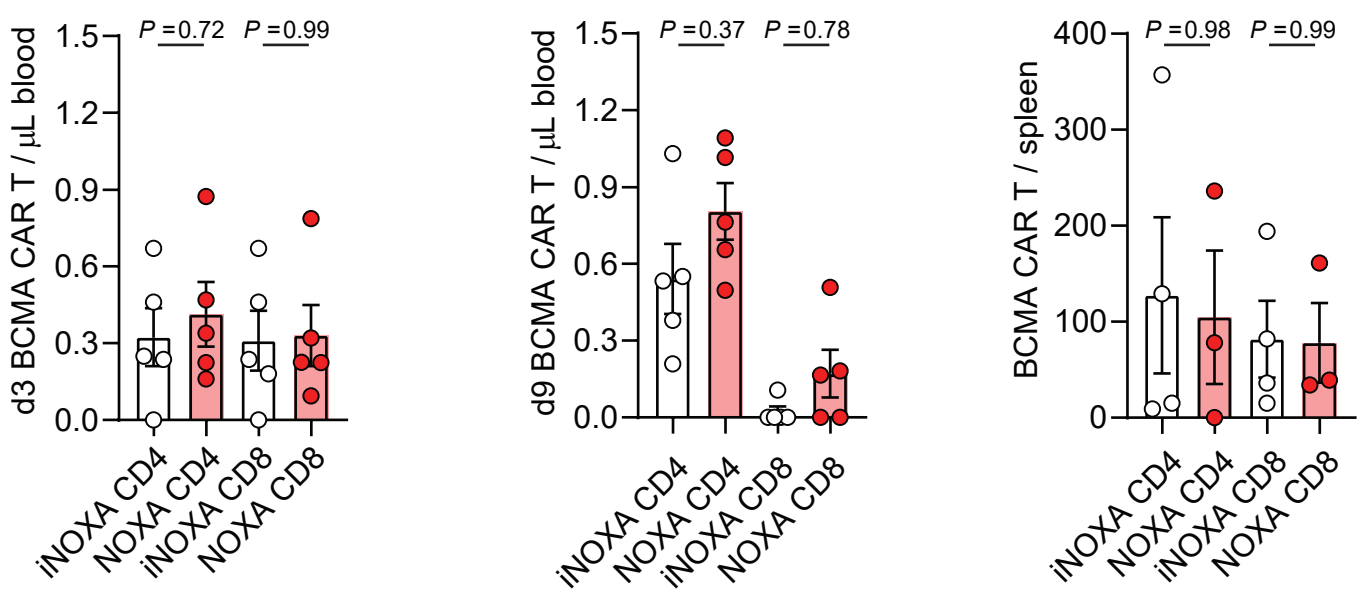

# Extended data figure 1

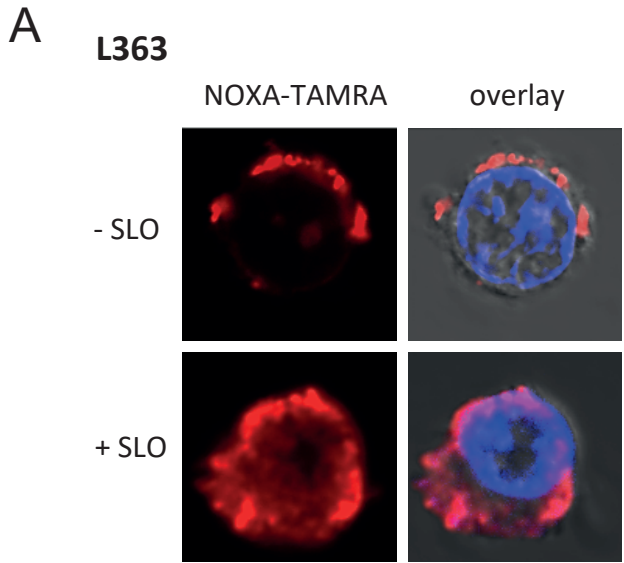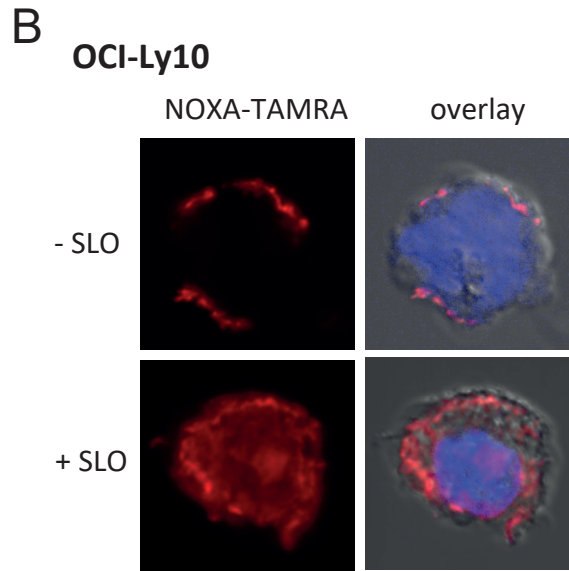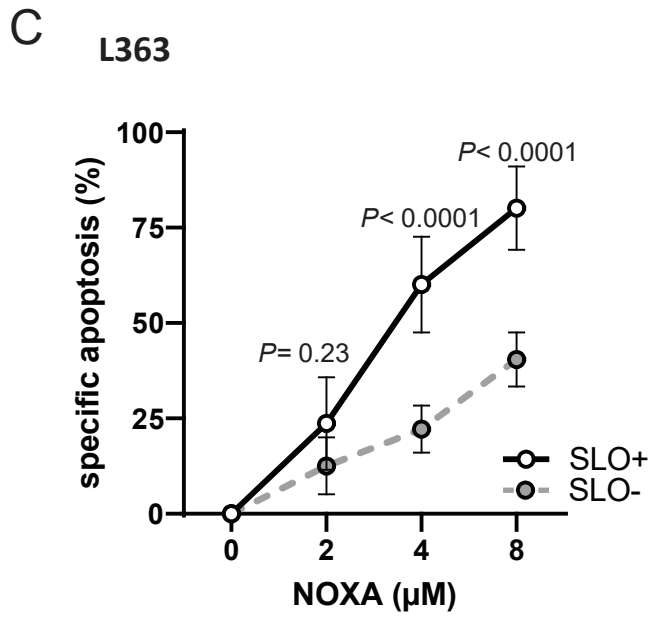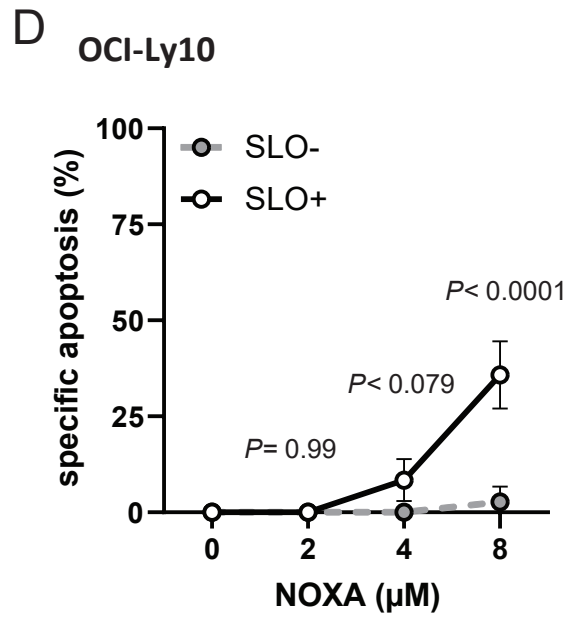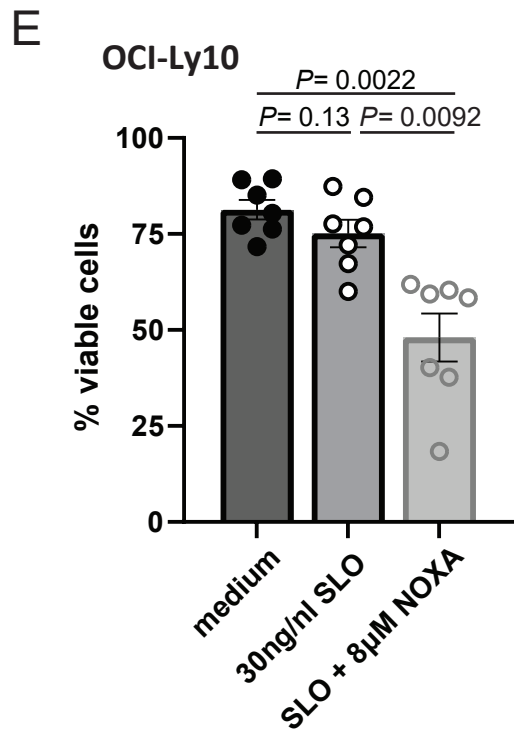

A

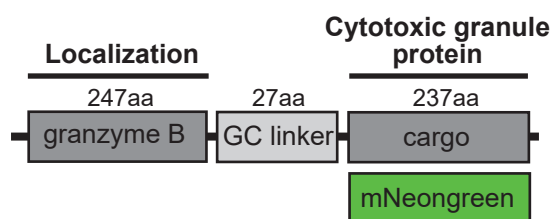

B

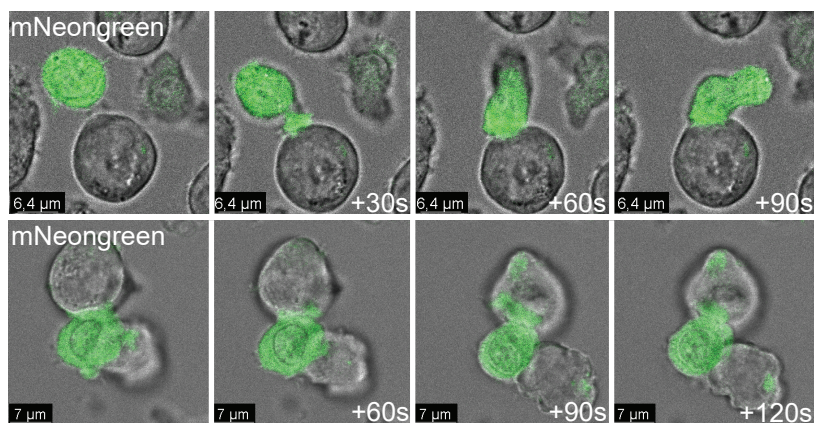



Extended data figure 3

A

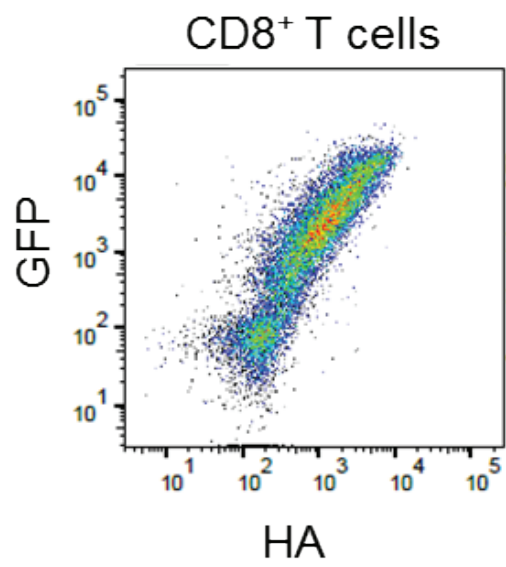

B

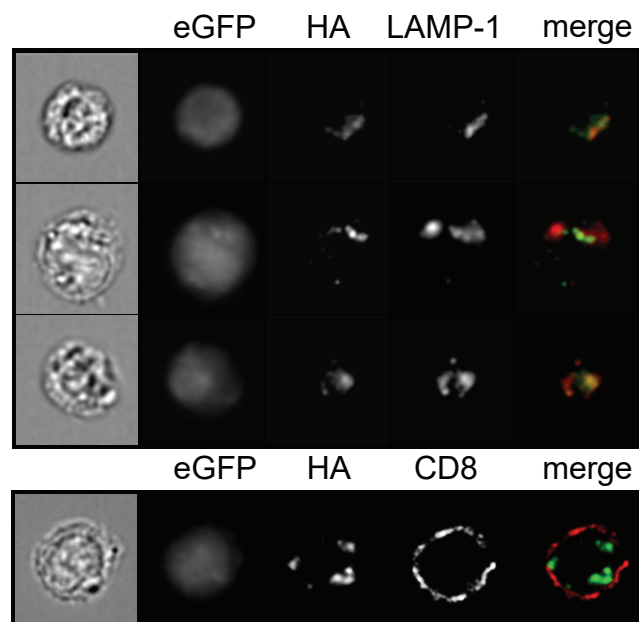

C

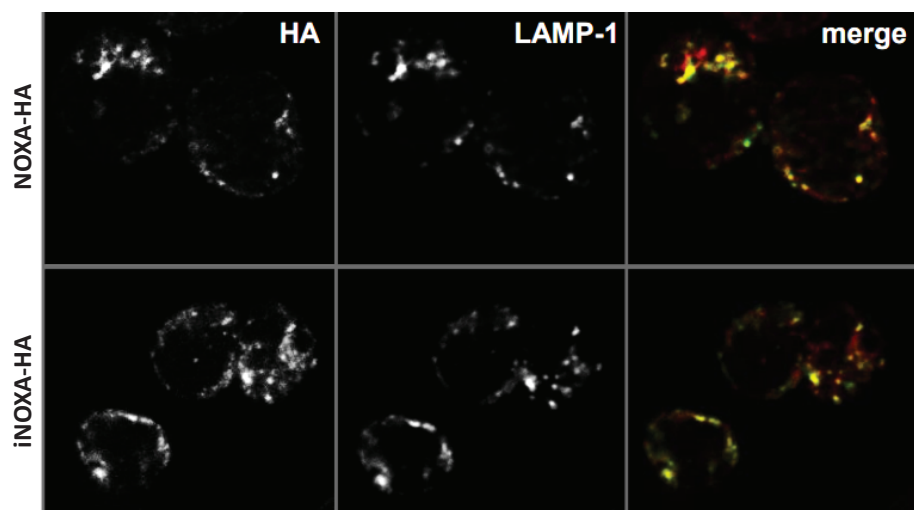

# Extended data figure 4

## A

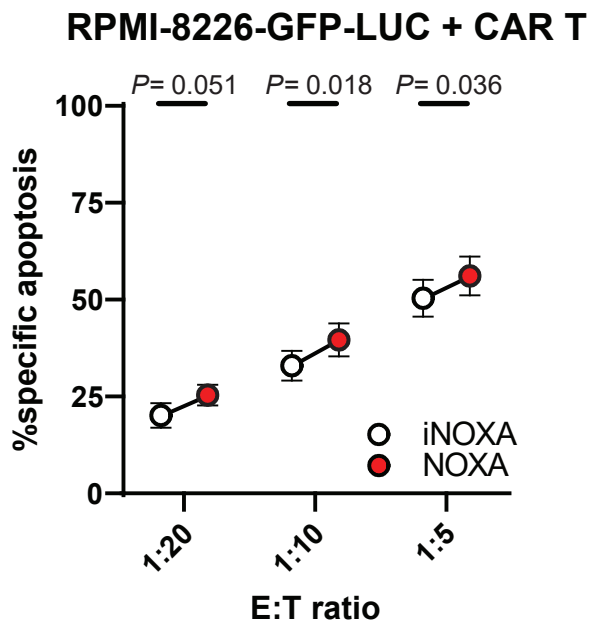

## B

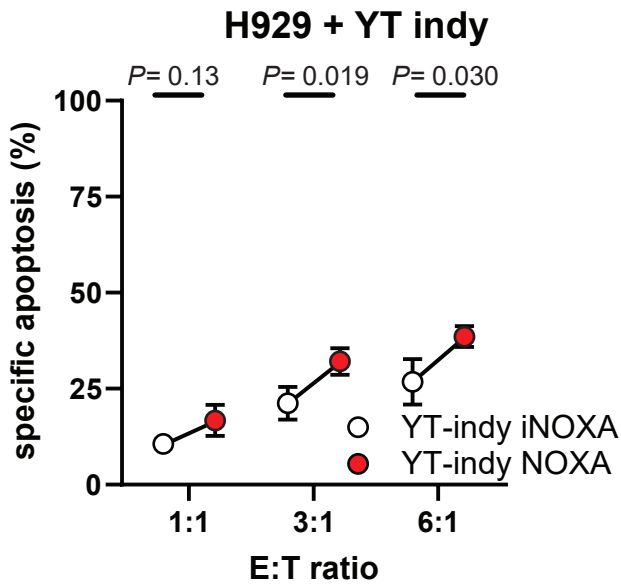

## C

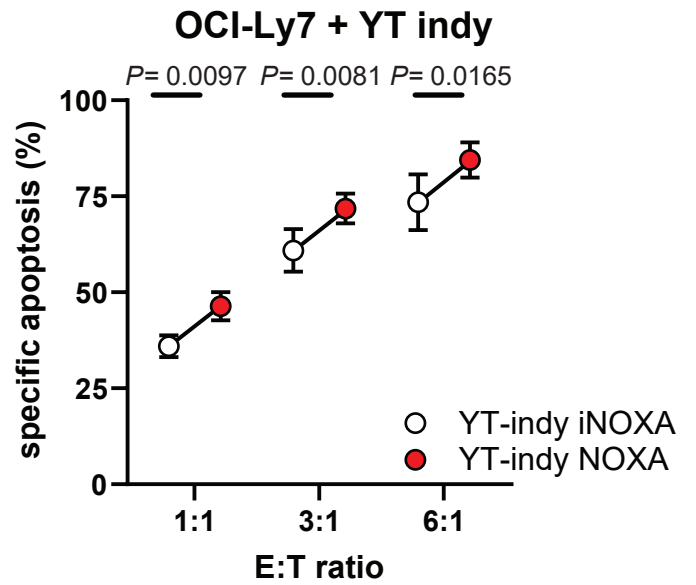

Source: https://www.biorxiv.org/content/10.1101/2024.02.14.580301.full.pdf
